# Supplementary material for: Retinoic acid receptor regulation of epimorphic and homeostatic regeneration in the axolotl
Source: Oxford University Press journal article supplement (doi:10.1242/dev.139873), 2017-01-14
Supplement: dev139873supp.pdf [file dev139873supp.pdf]

Table S1: List of probe-sets in Clusters 1-5. Contigs V4 represents the sequence ID in the version four assembly of the axolotl transcriptome found at Salsite

Expression values are averages across four biological replicates.

| Cluster 1 – ID  | Contig V4    | Symbol   | DMSO    | LE135    | RA       |
|-----------------|--------------|----------|---------|----------|----------|
| axo08692-f_at   | contig404063 | CYP26A1  | 206.93  | 4942.52  | 6138.28  |
| axo27297-f_at   | contig318347 | GATA2    | 29.63   | 346.64   | 256.60   |
| axo14037-f_at   | contig329187 | FAM115C  | 56.16   | 592.10   | 413.40   |
| axo13259-r_at   | contig348431 | ACAN     | 441.97  | 2591.37  | 2653.07  |
| axo07326-r_at   | contig218026 | GMDS     | 104.31  | 686.30   | 624.33   |
| axo18217-r_at   | contig348431 | BCAN     | 215.36  | 1126.55  | 1287.46  |
| axo08053-f_at   | contig141405 | KRT15    | 300.37  | 1373.52  | 1465.14  |
| axo08185-f_at   | contig122752 | MMP13    | 208.99  | 578.21   | 706.94   |
| axo03439-f_at   | contig315788 | EFEMP1   | 80.16   | 295.59   | 270.68   |
| axo10102-r_at   | contig96550  | FAP      | 281.57  | 721.34   | 831.81   |
| axo31468-f_at   | contig182995 | B3GNT5   | 130.45  | 321.26   | 371.32   |
| axo04609-f_at   | contig317411 | NLRP12   | 42.01   | 116.74   | 113.19   |
| axo08054-f_at   | contig71066  | KRT19    | 9658.14 | 27560.78 | 25675.97 |
| axo08051-f_at   | contig327242 | KRT15    | 155.29  | 481.81   | 401.88   |
| axo24095-f_at   | contig214059 | KRT8     | 575.91  | 1289.14  | 1420.97  |
| axo07862-r_at   | contig335606 | GCG      | 31.81   | 68.22    | 78.45    |
| axo17107-f_at   | contig336912 | DSCR6    | 16.72   | 40.66    | 40.45    |
| axo25693-f_at   | contig201477 | TGM2     | 652.45  | 1468.78  | 1561.64  |
| axo28644-f_at   | contig203883 | ALPL     | 122.24  | 335.71   | 287.30   |
| axo15578-f_s_at | contig81812  | A4GNT    | 431.26  | 970.64   | 1013.45  |
| axo07680-f_at   | contig91429  | CRABP2   | 3289.69 | 6610.13  | 7545.86  |
| axo25211-f_at   | contig315732 | 0        | 300.71  | 749.00   | 666.44   |
| axo27294-f_at   | contig315750 | BHLHE40  | 378.89  | 899.77   | 809.40   |
| axo23402-f_at   | contig183596 | CES2     | 99.34   | 187.38   | 207.68   |
| axo05908-f_at   | contig209094 | ASL      | 722.72  | 1606.02  | 1492.71  |
| axo07733-f_at   | contig320648 | DPP4     | 109.84  | 226.50   | 226.33   |
| axo07976-r_at   | contig131595 | ALDH1A3  | 683.05  | 1636.81  | 1391.14  |
| axo30225-f_at   | contig314469 | ELF3     | 1654.97 | 3676.45  | 3359.76  |
| axo19762-f_at   | contig188679 | DSEL     | 49.98   | 115.32   | 98.66    |
| axo05722-r_at   | contig323717 | ELFN1    | 101.09  | 177.15   | 196.24   |
| axo08049-f_at   | contig214059 | KRT8     | 5986.20 | 10357.20 | 11238.32 |
| axo09472-r_at   | contig319793 | SLC4A4   | 61.84   | 127.43   | 115.60   |
| axo14467-f_at   | contig315430 | SWAP70   | 19.71   | 34.45    | 36.43    |
| axo05068-f_at   | contig318764 | CYP4B1   | 625.50  | 1091.98  | 1148.85  |
| axo08615-r_at   | contig317111 | CYP2C8   | 207.74  | 392.39   | 379.66   |
| axo11396-f_at   | contig333619 | TM6SF2   | 315.16  | 572.31   | 569.35   |
| axo11397-f_at   | contig333619 | TM6SF2   | 220.15  | 387.67   | 388.74   |
| axo03338-r_at   | contig317491 | CDC42SE2 | 485.66  | 950.48   | 851.72   |
| axo17564-f_at   | contig317525 | NAV1     | 165.45  | 302.21   | 289.09   |
| axo12218-f_at   | contig314480 | VIL1     | 253.52  | 442.71   | 433.44   |
| axo25795-f_at   | contig318372 | 0        | 464.86  | 792.02   | 792.20   |
| axo29912-f_at   | contig139769 | TNFRSF1B | 22.61   | 39.51    | 38.34    |
| axo17498-f_at   | contig183147 | ABI1     | 1387.95 | 2104.84  | 2241.23  |
| axo05837-f_at   | contig203116 | MYO1B    | 1298.48 | 2165.57  | 2089.55  |
| axo16547-r_at   | contig122366 | FAM102B  | 280.72  | 433.82   | 450.16   |
| axo08834-f_at   | contig140063 | SOAT1    | 255.94  | 390.27   | 408.64   |
| axo26974-f_at   | contig320054 | 0        | 16.82   | 26.55    | 26.48    |
| axo19900-f_at   | contig315542 | FBLIM1   | 434.87  | 738.42   | 678.83   |
| axo30108-f_at   | contig314620 | 0        | 41.89   | 61.70    | 63.02    |
| axo11599-f_at   | contig94773  | VPS72    | 17.65   | 26.57    | 26.48    |
| axo26087-f_at   | contig134905 | 0        | 501.02  | 757.08   | 714.95   |
| axo01417-r_at   | contig327148 | GORAB    | 29.41   | 44.97    | 41.81    |

| <b>Cluster 1 – ID</b> | <b>Contig V4</b> | <b>Symbol</b> | <b>DMSO</b> | <b>LE135</b> | <b>RA</b> |
|-----------------------|------------------|---------------|-------------|--------------|-----------|
| axo07075-r_at         | contig02839      | CIRBP         | 3087.57     | 5578.40      | 3505.32   |
| axo29369-f_at         | contig183228     | LOC100497968  | 122.14      | 256.69       | 161.88    |
| axo24161-r_at         | contig204290     | 0             | 53.96       | 112.11       | 74.22     |
| axo24313-f_at         | contig100963     | B4GALT3       | 51.57       | 180.95       | 120.88    |
| axo29536-f_at         | contig314545     | SP7           | 133.59      | 384.16       | 256.79    |
| axo12983-r_at         | contig335498     | EHF           | 826.37      | 1966.11      | 1343.34   |
| axo30265-f_at         | contig183227     | LOC100497968  | 49.61       | 105.24       | 74.58     |
| axo08789-f_at         | contig317911     | SLC9A2        | 85.56       | 162.48       | 115.91    |
| axo21124-f_at         | contig315674     | SGK2          | 282.70      | 596.25       | 426.51    |
| axo03617-f_at         | contig324495     | HTR3A         | 34.46       | 57.45        | 41.64     |
| axo06308-r_at         | contig354267     | HSBP1L1       | 41.02       | 135.84       | 98.68     |
| axo09488-f_at         | contig100960     | B4GALT3       | 955.28      | 2999.29      | 2201.87   |
| axo12430-r_at         | contig320049     | UGT2A1        | 788.16      | 1694.39      | 1263.26   |
| axo30867-f_at         | contig317945     | ORF2p         | 373.85      | 567.49       | 423.43    |
| axo07918-r_at         | contig324756     | ALDH1A1       | 347.57      | 562.09       | 430.02    |
| axo01703-f_at         | contig314545     | SP7           | 196.49      | 323.57       | 249.27    |
| axo17370-f_at         | contig314941     | C1GALT1       | 368.24      | 861.70       | 669.21    |
| axo12581-f_at         | contig330612     | UPK3A         | 238.40      | 509.81       | 397.74    |
| axo12451-f_at         | contig94841      | ANXA2         | 424.67      | 704.58       | 552.16    |
| axo02833-r_at         | contig144380     | DLGAP4        | 59.05       | 129.24       | 102.07    |
| axo26457-f_at         | contig87521      | UPK2          | 2297.17     | 3588.20      | 2843.95   |
| axo07299-f_at         | contig89851      | FLT3LG        | 189.88      | 321.81       | 255.19    |
| axo13799-f_at         | contig158933     | SMPDL3B       | 342.62      | 905.37       | 727.38    |
| axo22098-r_at         | contig317558     | LOC582826     | 3847.70     | 8269.39      | 6701.24   |
| axo29553-f_at         | contig42357      | 0             | 400.84      | 717.91       | 584.15    |
| axo08960-f_at         | contig96781      | TGFB2         | 301.57      | 555.90       | 452.67    |
| axo05154-f_at         | contig41026      | 0             | 724.64      | 1422.61      | 1158.55   |
| axo17801-f_at         | contig156665     | BCAM          | 254.59      | 403.02       | 334.21    |
| axo27969-f_at         | contig314941     | C1GALT1       | 139.14      | 273.43       | 231.55    |
| axo11787-f_at         | contig61273      | NNMT          | 74.74       | 152.63       | 129.42    |
| axo06338-r_at         | contig156177     | ALOX15B       | 133.36      | 238.97       | 203.02    |
| axo19070-f_at         | contig203757     | TMC7          | 99.94       | 151.28       | 130.48    |
| axo01377-r_at         | contig191125     | CYB5A         | 76.52       | 129.18       | 112.19    |
| axo12781-r_at         | contig317883     | DUSP10        | 75.81       | 126.90       | 111.28    |
| axo09834-r_at         | contig331211     | PLCB3         | 41.01       | 67.21        | 59.35     |
| axo17095-r_at         | contig325397     | HOXC5         | 292.80      | 493.18       | 437.38    |
| axo19887-f_at         | contig315542     | FBLIM1        | 640.27      | 1043.58      | 929.60    |
| axo00636-f_at         | contig183192     | TANK          | 879.69      | 1444.06      | 1286.95   |
| axo08707-r_at         | contig317059     | CYP27A1       | 33.92       | 53.63        | 48.04     |
| axo06339-f_at         | contig284820     | ALOXE3        | 3087.57     | 5578.40      | 3505.32   |
| axo25438-f_at         | contig315060     | LOC100487575  | 122.14      | 256.69       | 161.88    |
| axo01819-f_at         | contig325945     | TMEM86A       | 53.96       | 112.11       | 74.22     |
| axo03393-f_at         | contig124564     | PDLIM7        | 51.57       | 180.95       | 120.88    |
| axo19069-f_at         | contig203757     | TMC7          | 133.59      | 384.16       | 256.79    |
| axo26981-f_at         | contig323649     | 0             | 826.37      | 1966.11      | 1343.34   |
| <b>Cluster 2 – ID</b> | <b>Contig V4</b> | <b>Symbol</b> | <b>DMSO</b> | <b>LE135</b> | <b>RA</b> |
| axo08368-f_at         | contig213508     | SERPINF1      | 2222.93     | 2615.88      | 3353.78   |
| axo02065-f_at         | contig222675     | PAPLN         | 52.57       | 64.65        | 81.43     |
| axo13076-f_at         | contig314961     | TLK1          | 116.40      | 143.46       | 190.70    |
| axo00939-f_at         | contig201534     | AP2B1         | 116.71      | 144.40       | 190.34    |
| axo30735-f_at         | contig1150716    | 0             | 13.11       | 16.25        | 22.63     |
| axo05737-r_at         | contig89831      | SRRT          | 268.94      | 336.86       | 407.11    |
| axo04940-f_at         | contig160920     | KIAA1217      | 93.68       | 117.44       | 153.39    |
| axo02837-f_at         | contig183029     | ZMYND8        | 66.84       | 84.41        | 108.94    |
| axo13263-f_at         | contig319754     | FLRT2         | 312.86      | 397.29       | 495.56    |

|                 |              |         |         |          |          |
|-----------------|--------------|---------|---------|----------|----------|
| axo10840-f_at   | contig58983  | PTBP3   | 209.23  | 267.25   | 351.83   |
| axo20348-f_s_at | contig02585  | 0       | 9769.92 | 12530.66 | 15647.45 |
| axo20225-f_at   | contig70850  | SYTL2   | 212.70  | 273.22   | 347.32   |
| axo12449-f_at   | contig145163 | PDIA5   | 34.12   | 44.18    | 55.01    |
| axo09815-f_at   | contig201539 | CLN3    | 33.92   | 43.99    | 52.21    |
| axo10279-f_at   | contig201438 | RARG    | 404.54  | 527.35   | 655.00   |
| axo21749-f_at   | contig44885  | ASPH    | 198.17  | 259.33   | 300.95   |
| axo13945-f_at   | contig519847 | LPIN2   | 49.35   | 65.61    | 100.91   |
| axo10841-r_at   | contig344288 | ABL1    | 55.78   | 74.22    | 91.60    |
| axo19786-f_at   | contig201354 | ARID5B  | 27.97   | 37.28    | 59.74    |
| axo02482-f_at   | contig201352 | SPTBN1  | 26.95   | 36.00    | 52.65    |
| axo08278-f_at   | contig84092  | NEO1    | 115.05  | 155.30   | 186.05   |
| axo17170-f_at   | contig317767 | TMX3    | 145.57  | 196.60   | 221.16   |
| axo01916-f_at   | contig204125 | MEIS1   | 897.36  | 1212.16  | 1785.85  |
| axo24728-f_at   | contig316121 | Pbx1    | 395.06  | 534.52   | 700.85   |
| axo07972-f_at   | contig75853  | IL6ST   | 57.63   | 78.14    | 88.18    |
| axo03303-r_at   | contig913319 | ZNF644  | 60.32   | 82.40    | 94.17    |
| axo10988-r_at   | contig78881  | HDLBP   | 1420.33 | 1943.08  | 2547.26  |
| axo02500-f_at   | contig321365 | FAM83C  | 194.22  | 266.91   | 297.16   |
| axo09449-f_at   | contig316562 | EIF3A   | 445.80  | 616.76   | 746.79   |
| axo22373-f_at   | contig316018 | ELL     | 53.29   | 74.14    | 95.44    |
| axo27168-f_at   | contig202564 | 0       | 238.22  | 335.72   | 391.76   |
| axo18098-f_at   | contig314341 | SCAF1   | 280.16  | 395.16   | 448.53   |
| axo19270-r_at   | contig316018 | ELL     | 101.26  | 143.42   | 189.34   |
| axo31446-f_at   | contig498950 | 0       | 50.94   | 73.87    | 108.31   |
| axo09451-f_at   | contig316562 | EIF3A   | 634.16  | 931.40   | 1229.75  |
| axo06511-f_at   | contig206427 | PCDH15  | 15.66   | 23.33    | 33.83    |
| axo15793-f_at   | contig316735 | PLEK2   | 166.06  | 248.29   | 408.61   |
| axo12547-f_at   | contig31793  | RAC1    | 701.66  | 1064.01  | 1181.86  |
| axo08165-f_at   | contig204123 | MEIS2   | 137.27  | 208.44   | 264.12   |
| axo01066-f_at   | contig183103 | DHRS13  | 81.29   | 123.44   | 146.07   |
| axo12021-r_at   | contig208666 | PAMR1   | 318.53  | 484.30   | 840.24   |
| axo31342-f_at   | contig07038  | MDK     | 167.61  | 255.19   | 329.75   |
| axo15637-f_at   | contig232269 | RBPMS   | 77.73   | 118.36   | 167.40   |
| axo23856-r_at   | contig314286 | ZNF638  | 96.62   | 147.26   | 215.29   |
| axo23411-r_at   | contig350226 | 12-RFa  | 60.98   | 94.83    | 118.88   |
| axo13184-f_at   | contig314239 | PLXNB2  | 100.29  | 156.09   | 198.67   |
| axo01242-f_at   | contig314311 | B3GNT7  | 46.45   | 72.35    | 101.10   |
| axo22164-f_at   | contig319202 | ORF2p   | 130.36  | 205.95   | 241.33   |
| axo23774-r_at   | contig98141  | SAMD9L  | 83.61   | 135.11   | 167.95   |
| axo31529-f_at   | contig609088 | 0       | 97.10   | 158.29   | 249.21   |
| axo08144-f_at   | contig324772 | MAS1    | 139.57  | 227.68   | 341.54   |
| axo02272-r_at   | contig314591 | KAL1    | 75.40   | 129.78   | 253.14   |
| axo26463-f_at   | contig11072  | 0       | 342.25  | 590.31   | 887.54   |
| axo29897-f_at   | contig202141 | 0       | 49.03   | 88.16    | 163.80   |
| axo02614-f_at   | contig156685 | NCOA3   | 38.38   | 69.85    | 90.50    |
| axo08659-f_at   | contig348569 | RBP1    | 141.66  | 258.82   | 476.33   |
| axo07968-f_at   | contig331042 | IGFBP6  | 118.06  | 217.57   | 379.44   |
| axo09525-f_at   | contig201630 | ADAM9   | 84.50   | 171.31   | 202.24   |
| axo03112-r_at   | contig202866 | MIA3    | 64.50   | 131.75   | 157.92   |
| axo12406-f_at   | contig325335 | INMT    | 121.14  | 252.11   | 347.90   |
| axo00883-r_at   | contig201901 | SDR16C5 | 72.08   | 152.16   | 213.62   |
| axo05624-r_at   | contig202985 | PAX6    | 70.22   | 149.63   | 244.68   |
| axo19711-f_at   | contig182995 | B3GNT5  | 602.57  | 1323.91  | 1677.55  |
| axo17540-f_at   | contig32472  | RHBG    | 128.26  | 309.64   | 409.04   |
| axo15713-f_at   | contig32473  | 0       | 203.57  | 509.54   | 794.09   |

|                       |                  |               |             |              |           |
|-----------------------|------------------|---------------|-------------|--------------|-----------|
| axo17320-f_at         | contig314231     | CYP26B1       | 140.39      | 385.65       | 787.24    |
| axo10419-r_at         | contig319441     | DHRS3         | 1248.15     | 3909.38      | 5533.37   |
| <b>Cluster 3 – ID</b> | <b>Contig V4</b> | <b>Symbol</b> | <b>DMSO</b> | <b>LE135</b> | <b>RA</b> |
| axo01795-f_at         | contig317829     | COL6A6        | 34.91       | 53.71        | 131.57    |
| axo07673-f_at         | contig317221     | TGFB1         | 582.86      | 854.03       | 1921.79   |
| axo09203-f_at         | contig202959     | NRIP1         | 295.99      | 403.26       | 759.93    |
| axo29426-f_at         | contig319614     | 0             | 45.23       | 59.94        | 154.86    |
| axo29487-f_at         | contig113456     | 0             | 267.38      | 352.02       | 685.39    |
| axo22976-r_at         | contig536857     | ORF2p         | 40.80       | 53.16        | 91.01     |
| axo14857-r_at         | contig406348     | FABP2         | 620.43      | 779.39       | 1572.08   |
| axo20292-f_at         | contig202171     | ZNF628        | 29.64       | 37.18        | 60.59     |
| axo01743-f_at         | contig213606     | APCDD1        | 440.27      | 549.05       | 935.47    |
| axo14041-f_at         | contig144299     | SLK           | 204.39      | 251.61       | 378.62    |
| axo12878-f_at         | contig505525     | ZNF236        | 17.77       | 21.70        | 32.37     |
| axo10076-f_at         | contig316552     | EPHA7         | 185.71      | 219.25       | 338.68    |
| axo10855-r_at         | contig318118     | RND3          | 670.15      | 788.15       | 1105.81   |
| axo11498-f_at         | contig144414     | MAP1B         | 14.62       | 16.96        | 22.28     |
| axo05508-f_at         | contig108550     | NAT2          | 54.79       | 63.16        | 105.93    |
| axo29388-f_at         | contig122394     | 0             | 65.20       | 74.66        | 185.21    |
| axo01710-f_at         | contig321423     | COL24A1       | 47.55       | 54.17        | 78.23     |
| axo29834-f_at         | contig104866     | 0             | 20.70       | 23.57        | 32.02     |
| axo18601-f_at         | contig314286     | ZNF638        | 152.37      | 170.92       | 263.03    |
| axo21619-f_at         | contig79033      | MUC17         | 35.75       | 39.94        | 54.32     |
| axo08089-r_at         | contig144601     | LGALS9        | 2679.95     | 2991.92      | 4555.10   |
| axo02086-f_at         | contig318355     | TSHZ2         | 225.46      | 251.29       | 346.67    |
| axo06130-f_at         | contig00844      | DCTN1         | 37.72       | 41.79        | 60.10     |
| axo08887-f_at         | contig314230     | STAT3         | 23.69       | 26.24        | 39.09     |
| axo22289-f_at         | contig492717     | 0             | 17.01       | 18.76        | 28.94     |
| axo22862-f_at         | contig572444     | NR3C1         | 101.51      | 110.35       | 167.44    |
| axo07689-f_at         | contig108550     | NAT2          | 44.13       | 47.69        | 87.20     |
| axo07751-r_at         | contig203287     | EDNRA         | 519.21      | 558.64       | 907.72    |
| axo21366-f_at         | contig449042     | HTRA3         | 26.13       | 27.60        | 39.40     |
| axo05907-r_at         | contig29809      | ERVW-1        | 150.00      | 157.05       | 261.95    |
| axo19156-f_x_at       | contig522203     | PIF1          | 61.29       | 63.89        | 108.11    |
| axo03396-r_at         | contig324586     | FIBIN         | 69.68       | 70.56        | 127.29    |
| axo04567-r_at         | contig318000     | TLL2          | 152.60      | 145.73       | 242.09    |
| axo08870-f_at         | contig319633     | CETP          | 104.43      | 90.74        | 228.96    |
| <b>Cluster 4 – ID</b> | <b>Contig V4</b> | <b>Symbol</b> | <b>DMSO</b> | <b>LE135</b> | <b>RA</b> |
| axo17416-r_at         | contig328693     | LHX9          | 240.73      | 205.15       | 86.37     |
| axo21354-f_at         | contig459992     | ZIC5          | 39.14       | 33.58        | 15.20     |
| axo08094-f_at         | contig215586     | LMO1          | 192.22      | 196.26       | 60.33     |
| axo10448-r_at         | contig329813     | LHX2          | 341.74      | 348.14       | 140.28    |
| axo08686-r_at         | contig326664     | RGS2          | 3359.06     | 3377.30      | 2092.44   |
| axo03262-f_at         | contig323589     | SPRY1         | 367.20      | 367.57       | 218.05    |
| axo06661-f_at         | contig109796     | CLEC4M        | 122.22      | 120.89       | 77.77     |
| axo00475-f_at         | contig204667     | RGS18         | 225.73      | 222.16       | 147.76    |
| axo02727-f_at         | contig183419     | VSTM2A        | 51.68       | 55.35        | 26.16     |
| axo08208-f_at         | contig327908     | MSX2          | 156.71      | 167.21       | 93.40     |
| axo17093-f_at         | contig324990     | ERRFI1        | 185.56      | 222.43       | 110.74    |
| axo00912-f_at         | contig205530     | DNER          | 136.25      | 167.57       | 63.95     |
| axo06766-f_at         | contig446525     | HOXA13        | 22.01       | 32.11        | 12.79     |
| axo08047-r_at         | contig104978     | ALOX5         | 29.13       | 45.27        | 24.89     |
| <b>Cluster 5 – ID</b> | <b>Contig V4</b> | <b>Symbol</b> | <b>DMSO</b> | <b>LE135</b> | <b>RA</b> |
| axo09539-f_at         | contig317419     | MATN4         | 1348.80     | 373.08       | 155.82    |
| axo27453-f_at         | contig316336     | SOX8          | 313.38      | 227.52       | 121.60    |
| axo12750-f_at         | contig319644     | PRSS23        | 564.03      | 341.49       | 196.12    |

|               |              |          |         |         |         |
|---------------|--------------|----------|---------|---------|---------|
| axo15048-r_at | contig322672 | SOSTDC1  | 255.65  | 204.55  | 117.99  |
| axo21673-f_at | contig400485 | PLAUR    | 179.45  | 91.64   | 54.58   |
| axo10418-f_at | contig213430 | CRLF1    | 1079.79 | 625.61  | 399.22  |
| axo16582-f_at | contig324910 | DOK4     | 311.50  | 101.27  | 65.46   |
| axo00390-f_at | contig329351 | ACY3     | 814.29  | 495.42  | 320.89  |
| axo15307-f_at | contig35781  | PRLH     | 335.21  | 104.07  | 69.31   |
| axo12311-f_at | contig146295 | CYP46A1  | 73.31   | 58.52   | 40.01   |
| axo15597-f_at | contig332528 | TMEFF2   | 74.85   | 59.79   | 41.27   |
| axo05010-f_at | contig331193 | ODZ4     | 23.45   | 16.84   | 11.78   |
| axo19810-r_at | contig315011 | SLITRK6  | 916.05  | 713.99  | 514.51  |
| axo08991-f_at | contig317515 | TLR2     | 235.53  | 146.54  | 110.78  |
| axo21139-f_at | contig315752 | FAM198A  | 300.85  | 255.04  | 196.46  |
| axo31298-f_at | contig125174 | SRSF1    | 71.71   | 51.32   | 39.67   |
| axo11178-r_at | contig322738 | KRT6A    | 8101.74 | 4824.81 | 3763.45 |
| axo10111-f_at | contig328429 | FIGF     | 149.24  | 113.90  | 89.32   |
| axo25678-f_at | contig321552 | 0        | 122.86  | 75.87   | 59.78   |
| axo18649-f_at | contig320823 | ADRB2    | 157.53  | 121.28  | 98.70   |
| axo17132-f_at | contig333290 | GFOD1    | 568.41  | 456.51  | 371.87  |
| axo10575-f_at | contig00360  | AQP3     | 459.94  | 171.16  | 140.57  |
| axo00180-f_at | contig316890 | HK2      | 1853.51 | 1472.50 | 1212.80 |
| axo29026-f_at | contig315244 | EBF3     | 46.40   | 21.60   | 17.88   |
| axo17962-r_at | contig315424 | SNTB1    | 367.74  | 243.29  | 202.39  |
| axo09980-f_at | contig84702  | CAMP     | 23.72   | 16.93   | 14.21   |
| axo16967-f_at | contig315401 | LGR4     | 550.17  | 421.69  | 357.33  |
| axo19489-f_at | contig326451 | PPP1R14C | 105.93  | 59.23   | 50.76   |
| axo13629-r_at | contig314946 | TDRD7    | 266.38  | 193.03  | 165.65  |
| axo02549-r_at | contig145113 | LRRTM1   | 29.30   | 21.26   | 18.42   |
| axo08844-f_at | contig108643 | UAP1     | 1225.18 | 648.17  | 565.39  |
| axo08425-f_at | contig901913 | PMCH     | 87.79   | 45.11   | 39.37   |
| axo09479-r_at | contig207957 | STX11    | 141.04  | 104.51  | 93.20   |
| axo13728-f_at | contig145817 | GPR160   | 1091.97 | 775.00  | 694.95  |
| axo29537-f_at | contig00360  | AQP3     | 4582.77 | 1780.67 | 1600.77 |
| axo07606-f_at | contig119883 | CDO1     | 1160.52 | 621.33  | 563.83  |
| axo10890-f_at | contig210025 | DLX6     | 301.14  | 122.98  | 112.94  |
| axo09755-f_at | contig240523 | DDIT3    | 695.84  | 329.48  | 305.58  |
| axo28206-f_at | contig189635 | 0        | 77.07   | 54.73   | 51.22   |
| axo09572-f_at | contig314779 | NRP1     | 940.21  | 553.61  | 519.33  |
| axo10235-r_at | contig145583 | PPP2R2B  | 53.95   | 36.57   | 34.35   |
| axo00370-r_at | contig205164 | WFDC8    | 5302.31 | 2195.22 | 2129.59 |
| axo01691-r_at | contig155714 | MAP7D2   | 952.93  | 638.11  | 623.00  |
| axo02921-f_at | contig207363 | LYPD6    | 115.99  | 72.04   | 72.24   |
| axo30782-f_at | contig586298 | 0        | 447.94  | 110.51  | 111.93  |
| axo08845-f_at | contig108639 | UAP1     | 2137.26 | 1051.17 | 1074.54 |
| axo14878-f_at | contig213396 | IFRD1    | 748.41  | 467.82  | 479.04  |
| axo17826-f_at | contig315002 | LRRN1    | 181.59  | 117.37  | 120.80  |
| axo18334-f_at | contig224374 | EPB41L4A | 185.79  | 105.49  | 112.64  |
| axo27196-f_at | contig140511 | 0        | 525.96  | 323.28  | 346.27  |
| axo13696-f_at | contig206805 | B4GALT1  | 217.43  | 138.70  | 149.23  |
| axo18652-f_at | contig335278 | GPR87    | 135.39  | 69.80   | 75.29   |
| axo12916-f_at | contig315308 | ATF5     | 790.21  | 502.27  | 546.94  |
| axo29526-f_at | contig315308 | ATF5     | 1796.67 | 1092.27 | 1191.86 |
| axo05994-f_at | contig322028 | DSG1     | 81.37   | 33.47   | 36.62   |
| axo04822-f_at | contig324687 | AADAC    | 120.96  | 74.05   | 81.51   |
| axo30262-f_at | contig201678 | POF1B    | 3567.33 | 2330.98 | 2572.29 |
| axo25307-f_at | contig157229 | ARHGEF3  | 707.56  | 399.07  | 441.12  |
| axo30681-f_at | contig170203 | 0        | 615.84  | 239.19  | 264.87  |

|                 |                          |              |          |          |          |
|-----------------|--------------------------|--------------|----------|----------|----------|
| axo07343-r_at   | contig322127             | IGFBP2       | 1676.10  | 850.29   | 945.17   |
| axo06462-f_at   | contig318299             | HMMR         | 303.73   | 195.57   | 217.63   |
| axo31319-f_s_at | contig340923             | 0            | 5632.84  | 2404.49  | 2703.39  |
| axo12982-f_at   | contig210232             | LPAR3        | 709.16   | 470.45   | 530.52   |
| axo00523-f_at   | contig314561             | WHSC1        | 117.01   | 74.81    | 84.51    |
| axo01274-f_at   | contig204252             | SLC25A43     | 240.35   | 157.67   | 179.81   |
| axo25163-f_at   | contig31030              | KRT14        | 202.97   | 74.82    | 85.54    |
| axo19313-f_at   | contig117893             | TRAF3IP3     | 319.47   | 199.47   | 228.71   |
| axo15598-f_at   | contig101335             | KIF20B       | 487.38   | 309.69   | 355.35   |
| axo21628-f_at   | contig325197             | NEFH         | 145.25   | 64.20    | 74.43    |
| axo24800-f_at   | contig158133             | 0            | 124.89   | 65.62    | 76.17    |
| axo06250-f_at   | contig318656             | TMEM2        | 273.92   | 165.18   | 193.54   |
| axo10520-f_at   | contig317794             | KIF23        | 136.12   | 84.26    | 99.03    |
| axo05362-f_at   | contig101264             | TGM1         | 1184.62  | 376.88   | 443.15   |
| axo12794-r_at   | contig320288             | CA5B         | 6937.32  | 3997.12  | 4712.54  |
| axo08130-f_at   | contig321153             | MAD2L1       | 1172.97  | 742.41   | 882.44   |
| axo30895-f_at   | Mex_Nohits_5134_Contig_1 | DSG1         | 289.59   | 55.10    | 65.54    |
| axo06014-r_at   | contig107129             | KRT17        | 24345.81 | 15693.58 | 18702.37 |
| axo25906-f_at   | contig157119             | LRIG1        | 120.87   | 74.48    | 89.01    |
| axo17376-f_at   | contig316531             | SMARCD1      | 1347.62  | 891.88   | 1073.84  |
| axo13117-f_at   | contig144456             | KIF4A        | 415.11   | 274.64   | 333.41   |
| axo22446-f_at   | contig16773              | 0            | 13354.85 | 7533.04  | 9193.32  |
| axo16976-r_at   | contig345060             | MCM10        | 155.37   | 101.71   | 125.02   |
| axo29791-f_at   | contig337266             | 0            | 456.63   | 261.24   | 325.43   |
| axo08594-f_at   | contig183016             | PTPRZ1       | 2774.80  | 1405.71  | 1755.90  |
| axo22465-f_at   | contig361194             | LOC100493186 | 554.85   | 97.36    | 122.04   |
| axo16742-f_at   | contig320419             | NEIL3        | 152.62   | 94.93    | 119.18   |
| axo16457-f_at   | contig315182             | FAM83B       | 816.57   | 435.76   | 548.62   |
| axo24155-f_at   | contig322400             | VWA1         | 1135.92  | 337.39   | 426.38   |
| axo10609-f_at   | contig319066             | DNASE1L3     | 763.50   | 247.26   | 312.94   |
| axo16459-f_at   | contig315182             | FAM83B       | 743.32   | 420.07   | 537.77   |
| axo17023-f_at   | contig93627              | ANLN         | 1046.46  | 618.17   | 793.86   |
| axo07565-r_at   | contig157680             | CAPNS1       | 6479.59  | 3797.16  | 4896.87  |
| axo13224-f_at   | contig191649             | SSBP2        | 36.49    | 23.76    | 30.75    |
| axo10960-r_at   | contig193055             | GPR37        | 90.83    | 39.25    | 52.06    |
| axo10941-f_at   | contig183579             | GJB5         | 3725.53  | 2198.59  | 2921.63  |
| axo07098-f_at   | contig320761             | CLDN4        | 1345.88  | 844.35   | 1147.67  |
| axo12746-f_at   | contig326291             | TESK1        | 105.89   | 57.87    | 80.49    |
| axo12416-f_at   | contig45417              | CDC42EP2     | 354.88   | 211.21   | 294.40   |
| axo26830-f_at   | contig315102             | TNFAIP2      | 3344.62  | 1762.78  | 2482.56  |
| axo05416-f_at   | contig90858              | TP63         | 506.84   | 285.25   | 402.24   |
| axo17885-f_at   | contig314301             | NINL         | 642.02   | 341.98   | 482.59   |
| axo09083-r_at   | contig315134             | UGCG         | 2075.89  | 1235.60  | 1771.19  |
| axo10676-f_at   | contig317489             | NRCAM        | 33.65    | 21.11    | 30.41    |
| axo01062-f_at   | contig316980             | OTOA         | 2030.12  | 992.85   | 1434.19  |
| axo07003-f_at   | contig318791             | BMPR1B       | 291.16   | 113.49   | 165.75   |
| axo27884-f_at   | contig317088             | 0            | 355.63   | 128.55   | 192.28   |
| axo14381-f_at   | contig190217             | PDZRN3       | 281.81   | 147.21   | 227.66   |
| axo26905-f_at   | contig321754             | 0            | 1307.60  | 815.75   | 1287.50  |
| axo26217-f_at   | contig321024             | 0            | 235.20   | 105.83   | 167.67   |
| axo05289-f_at   | contig01876              | GJB6         | 506.91   | 91.04    | 144.68   |
| axo03604-f_at   | contig206358             | NEBL         | 224.83   | 100.94   | 166.29   |
| axo12174-f_at   | contig113035             | TFPI2        | 342.73   | 143.51   | 237.98   |
| axo12175-f_at   | contig113037             | TFPI2        | 328.64   | 124.95   | 217.41   |
| axo21314-f_at   | contig131977             | KRTAP5-8     | 954.17   | 168.56   | 339.30   |
| axo06032-f_at   | contig316632             | KRT5         | 1374.40  | 47.06    | 194.55   |
